# Supplementary material
Source: publisher figshare collection journal article supplement (https://acs.figshare.com/ndownloader/files/9827272)
Supplement: Supplementary file 1 [file 9827272]

Supporting Information

Number of Pages: 2 (S1-S2)

Number of Figures: 2 (S1-S2)

## An Electrospun Decellularized Lung Matrix Scaffold for Airway Smooth Muscle Culture

*Bethany M. Young<sup>1</sup>, Keerthana Shankar<sup>1</sup>, Brittany P. Allen<sup>1</sup>, Robert A. Pouliot<sup>1</sup>, Matthew B. Schneck<sup>1</sup>, Nabil Mikhael<sup>1</sup>, Rebecca L. Heise\*<sup>1,2</sup>*

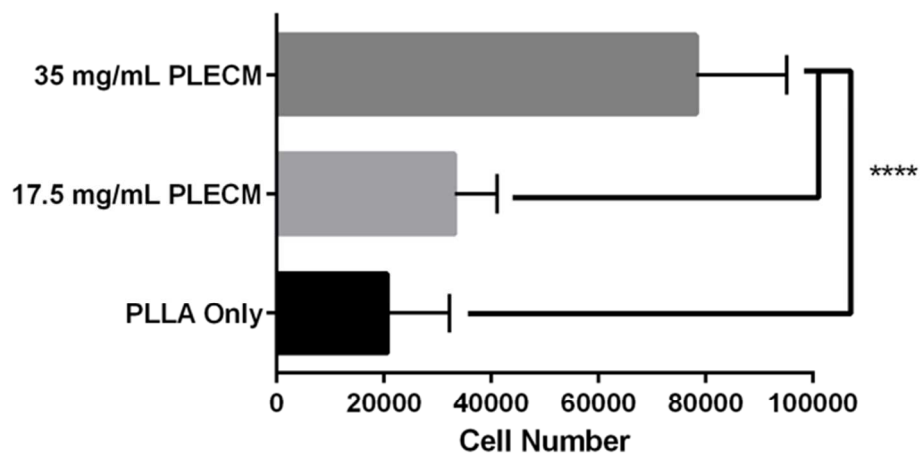

Figure S1. Picogreen DNA quantification showing tested PLECM concentrations for scaffold optimization.

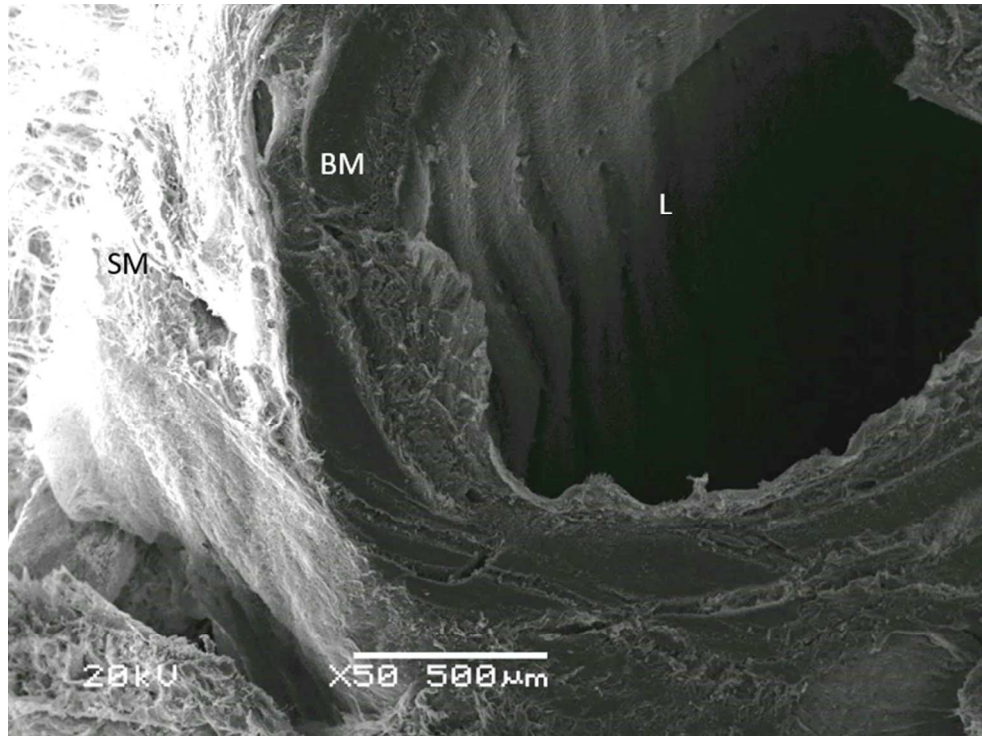

Figure S2. Low magnification of decellularized airway. L represents Airway lumen, BM represents basement membrane, and SM represents submucosa where ASM would be located and fiber distribution was taken from.
